# Supplementary material for: Bioactive Scaffold Fabricated by 3D Printing for Enhancing Osteoporotic Bone Regeneration
Source: MDPI journal article supplement (doi:10.3390/bioengineering9100525), 2022-10-05
Supplement: s1 [file s1]

## Supporting Information

# Bioactive Scaffold Fabricated by 3D Printing for Enhancing Osteoporotic Bone Regeneration

Xiaoting Zhang <sup>1,2,†</sup>, Xinluan Wang <sup>3,†</sup>, Yuk-wai Lee <sup>4,5,6</sup>, Lu Feng <sup>1,2</sup>, Bin Wang <sup>1,2</sup>, Qi Pan <sup>1,2</sup>, Xiangbo Meng <sup>3</sup>, Huijuan Cao <sup>3</sup>, Linlong Li <sup>1,2</sup>, Haixing Wang <sup>1,2</sup>, Shanshan Bai <sup>1,2</sup>, Lingchi Kong <sup>1,2</sup>, Dick Ho Kiu Chow <sup>1,2</sup>, Ling Qin <sup>1,2</sup>, Liao Cui <sup>7</sup>, Sien Lin <sup>1,2,\*</sup> and Gang Li <sup>1,2,\*</sup>

- <sup>1</sup> Musculoskeletal Research Laboratory, Department of Orthopaedics & Traumatology, The Chinese University of Hong Kong, Prince of Wales Hospital, Hong Kong SAR, China
  - <sup>2</sup> Stem Cells and Regenerative Medicine Laboratory, Li Ka Shing Institute of Health Sciences, The Chinese University of Hong Kong, Prince of Wales Hospital, Hong Kong SAR, China
  - <sup>3</sup> Shenzhen Institute of Advanced Technology, Chinese Academy of Sciences, Shenzhen 518055, China
  - <sup>4</sup> SH Ho Scoliosis Research Laboratory, Department of Orthopaedics and Traumatology, The Chinese University of Hong Kong, Hong Kong SAR, China
  - <sup>5</sup> Joint Scoliosis Research Center of the Chinese University of Hong Kong and Nanjing University, The Chinese University of Hong Kong, Hong Kong SAR, China
  - <sup>6</sup> Li Ka Shing Institute of Health Sciences, The Chinese University of Hong Kong, Hong Kong SAR, China
  - <sup>7</sup> School of Pharmacy and Guangdong Key Laboratory for Research and Development of Natural Drugs, Guangdong Medical University, Zhanjiang 524023, China
- \* Correspondence: sienlin@cuhk.edu.hk (S.L.); gangli@cuhk.edu.hk (G.L.)  
† These authors contributed equally to this work.

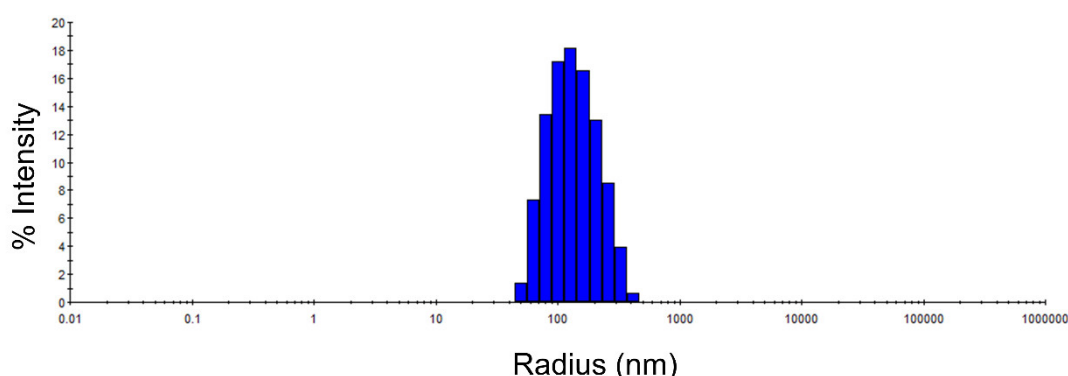

**Figure S1.** Particle size distribution of secretome derived from human fetal mesenchymal stem cells (HFS).

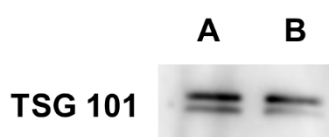

**Figure S2.** Western blotting of the exosome marker TSG101. A&B: different batch of HFS.

**A**

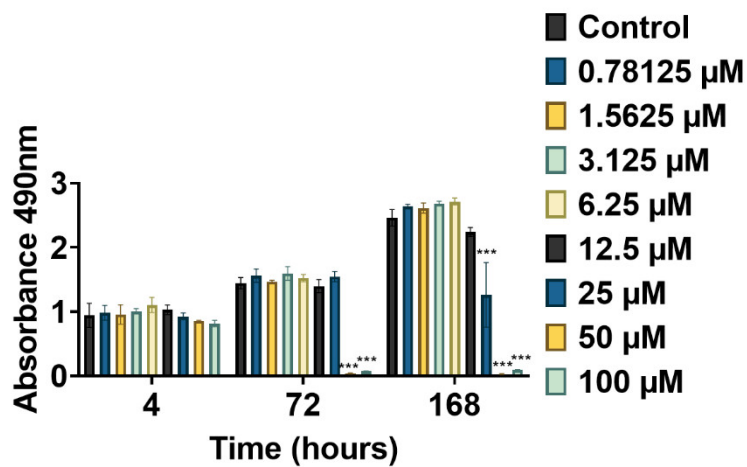

**B**

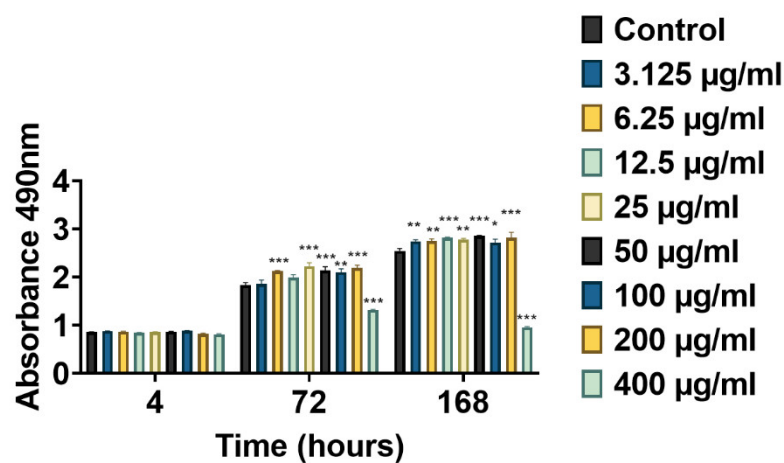

**Figure S3.** Proliferation of the rat mesenchymal stem cells (rMSCs) treated with different concentrations of ICT (A) and HFS (B) for 7 days culture, respectively. Data were shown as mean  $\pm$  SD (\* $P$  < 0.05, \*\* $P$  < 0.01, \*\*\* $P$  < 0.001, one-way ANOVA with Tukey's HSD,  $n=3$ ).

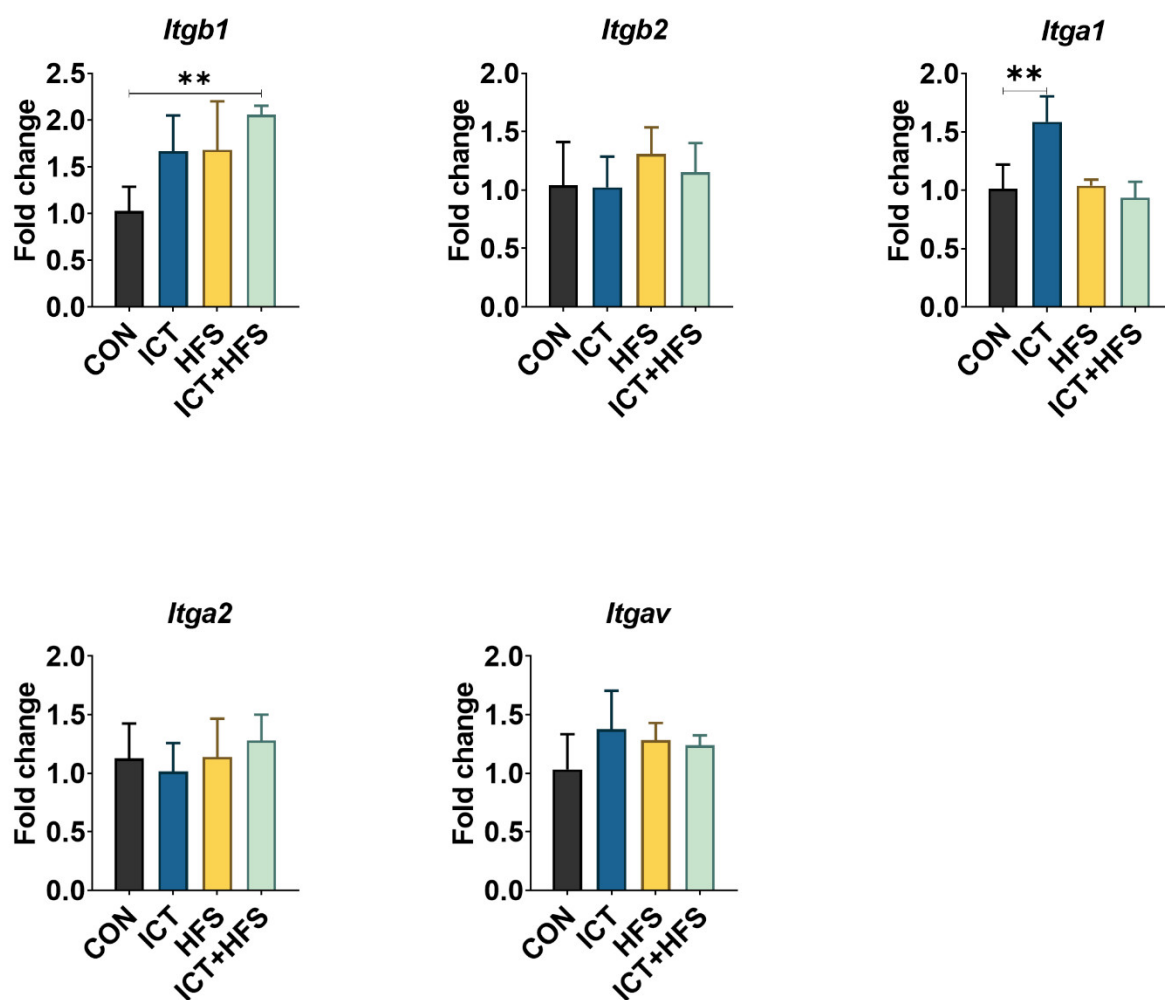

**Figure S4.** mRNA levels of integrin subunits in rMSCs. Data were shown as mean  $\pm$  SD. (\*\* $P < 0.01$ , one-way ANOVA with Tukey's HSD,  $n=3$ ).

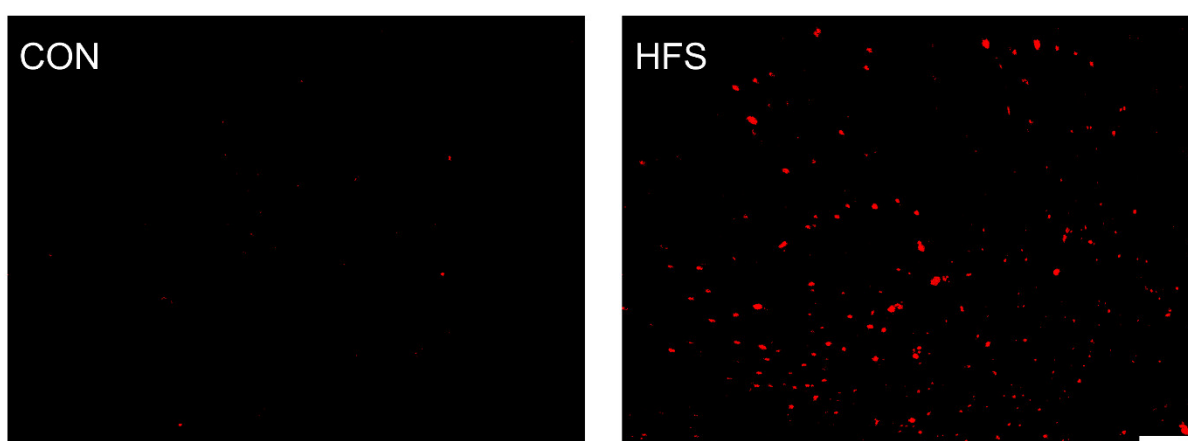

**Figure S5.** Representative fluorescent images of PKH26-positive particles in PKH26-labeled HFS-free control (CON) and in PKH26-labeled HFS (HFS). Scale bar =  $2\mu\text{m}$ .

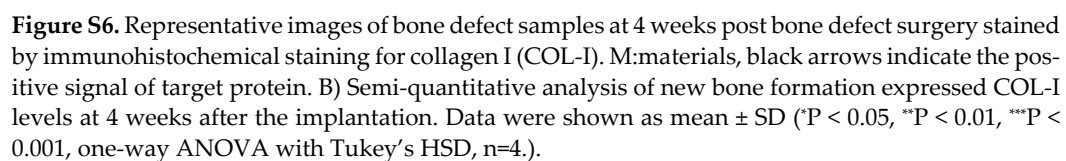

| Gene         | Forward                   | Reverse                    |
|--------------|---------------------------|----------------------------|
| <i>Gapdh</i> | 5'AGCCCAGAACATCATCCCTG'3  | 5'CACCACCTTCTTGATGTCATC'3  |
| <i>Alp</i>   | 5'CCTTAGGGCCACCGCTCG'3    | 5'GTTCAGTGCGGTTCAGACA'3    |
| <i>Runx2</i> | 5'CCGATGGGACCGTGTT'3      | 5'CAGCAGAGGCATTTTCGTAGCT'3 |
| <i>Bglap</i> | 5'CTCAACAATGGACTTGGAGCC'3 | 5'GTCCGCTAGCTCGTCACAAT'3   |
| <i>Itgb1</i> | 5'CAAGTGGGACACGGGTGAA'3   | 5'AGCTTGATTCCAAGGGTCCG'3   |
| <i>Itgb2</i> | 5'AAGCCTGCAAGGAGGAAGTC'3  | 5'CCACTGACGGGTAGTCGAAC'3   |
| <i>Itga1</i> | 5'AGTCCACGAACACATTCCT'3   | 5'TGCTGGGACTTGACGATCAG'3   |
| <i>Itga2</i> | 5' CACTGCCACCTGTGAAAAGC'3 | 5' AGGACCGCAGGTTAGAAAGC'3  |
| <i>Itga3</i> | 5'CAAACGGAACCAGAGGATGG'3  | 5'TAGCTTCATACAGGGCACGA'3   |
| <i>Itgav</i> | 5' TGGCACAAAGACCGTTGAGT'3 | 5'AGCTCCGACAATAAGTCTGGA'3  |

**Table S2.** List of antibodies.

| <b>Product name</b>                                                     | <b>Catalog number</b> | <b>Supplier</b>           | <b>Application</b>          |
|-------------------------------------------------------------------------|-----------------------|---------------------------|-----------------------------|
| Integrin $\alpha$ 3 Polyclonal Antibody                                 | YT2362                | Immunoway                 | Western Blot: 1/1000        |
| Phospho-FAK (Tyr397) Antibody                                           | #3283                 | Cell signaling technology | Western Blot: 1/1000        |
| FAK Antibody                                                            | #3285                 | Cell signaling technology | Western Blot: 1/1000        |
| Phospho-p44/42 MAPK (Erk1/2) (Thr202/Tyr204) (D13.14.4E) XP® Rabbit mAb | #8544                 | Cell signaling technology | Western Blot: 1/1000        |
| p44/42 MAPK (Erk1/2) (137F5) Rabbit mAb                                 | #4695                 | Cell signaling technology | Western Blot: 1/1000        |
| GAPDH Antibody (FL-335)                                                 | sc-25778              | Santa Cruz Biotechnology  | Western Blot: 1/1000        |
| Anti-RUNX2 antibody                                                     | ab76956               | abcam                     | Immunohistochemistry: 1/200 |
| Recombinant Anti-Vimentin antibody                                      | ab92547               | abcam                     | Immunohistochemistry: 1/500 |
| Anti-SOX2 antibody                                                      | ab97959               | abcam                     | Immunohistochemistry: 1/200 |
| Recombinant Anti-TSG101 antibody                                        | ab125011              | abcam                     | Western Blot: 1/1000        |
